# Supplementary material
Source: publisher figshare collection journal article supplement (https://acs.figshare.com/ndownloader/files/20046593)
Supplement: Supplementary file 1 [file 20046593]

## **Wettability Alteration in Low-Permeability Sandstone Reservoirs by**

### **“SiO<sub>2</sub>-Rhamnolipid” Nanofluid**

Di Wang<sup>a,d</sup>, Shanshan Sun<sup>a,c\*</sup>, Kai Cui<sup>a</sup>, Hailan Li<sup>a</sup>, Yejing Gong<sup>a</sup>, Jirui Hou<sup>b</sup>,

Zhongzhi Zhang<sup>a</sup>

<sup>a</sup> State Key Laboratory of Heavy Oil Processing, China University of Petroleum,

Beijing, 102249, P. R. China

<sup>b</sup> Research Institute of Enhanced Oil Recovery, China University of Petroleum,

Beijing, P. R. China

<sup>c</sup> Petroleum Engineering College of Yangtze University, WuHan, HuBei, P. R. China

<sup>d</sup> Shenyang Institute of Applied Ecology, Chinese Academy of Sciences, ShenYang,

LiaoNing, P. R. China

\*Corresponding authors: Tel: +86–10–89734284; Fax: +86–10–89734284; E–mail

address: [sssun33@163.com](mailto:sssun33@163.com)

## Supporting Materials

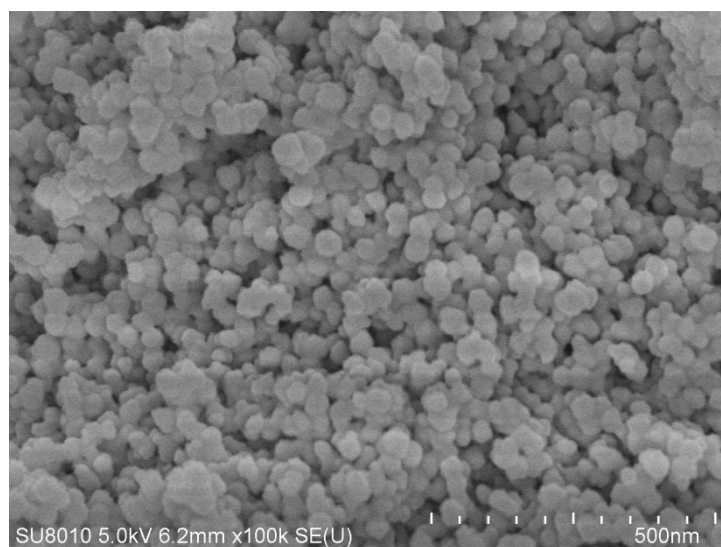

**Figure S1.** Scanning electron micrograph of utilized SiO<sub>2</sub> nanoparticles.

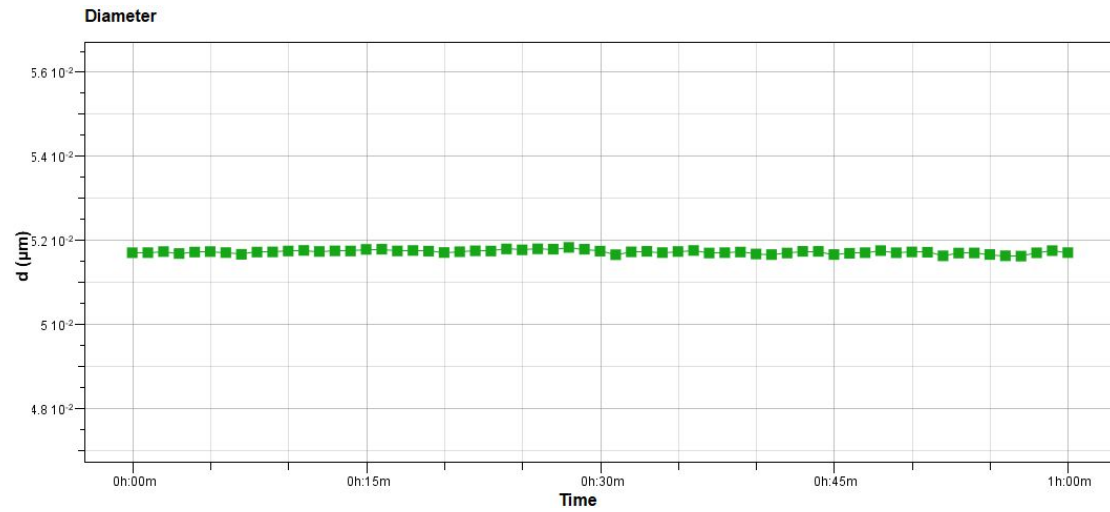

**Figure S2** The size of nanoparticles in bionanofluid measured by dynamic light scattering.
